# Supplementary material
Source: Springer Nature journal article supplement (https://www.springermedizin.de/resource/supplementary/13643_2012_43_MOESM2_ESM.pdf/9681308)
Supplement: MOESM2 [file 9681308]

Broad review  
question

Broad map

Synthesis 1

Synthesis 2

Synthesis 3
